# Supplementary material for: Identification of Two Novel Circular RNAs Deriving from BCL2L12 and Investigation of Their Potential Value as a Molecular Signature in Colorectal Cancer
Source: MDPI journal article supplement (doi:10.3390/ijms21228867), 2020-11-23

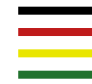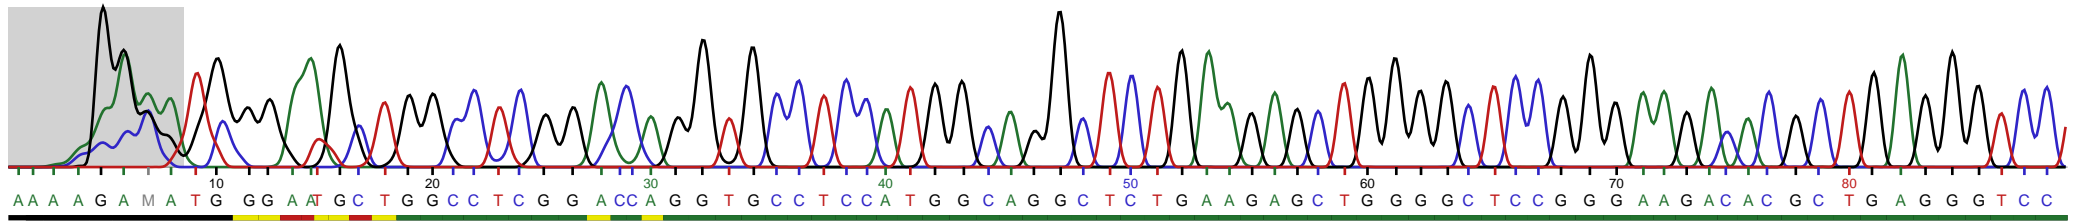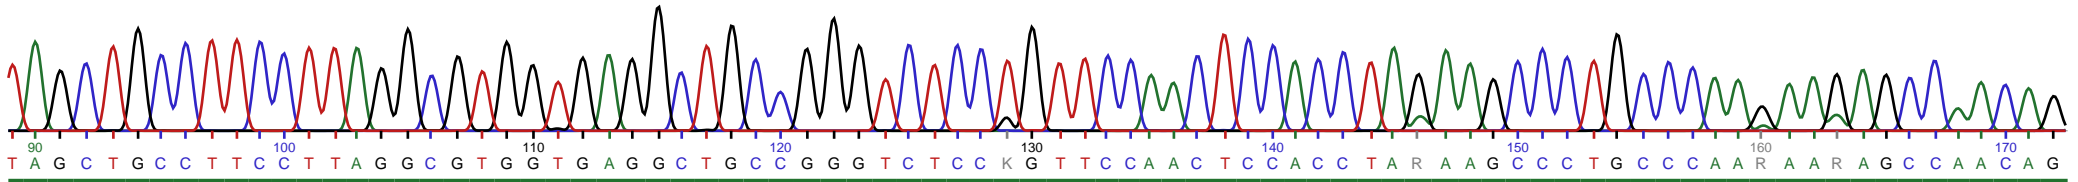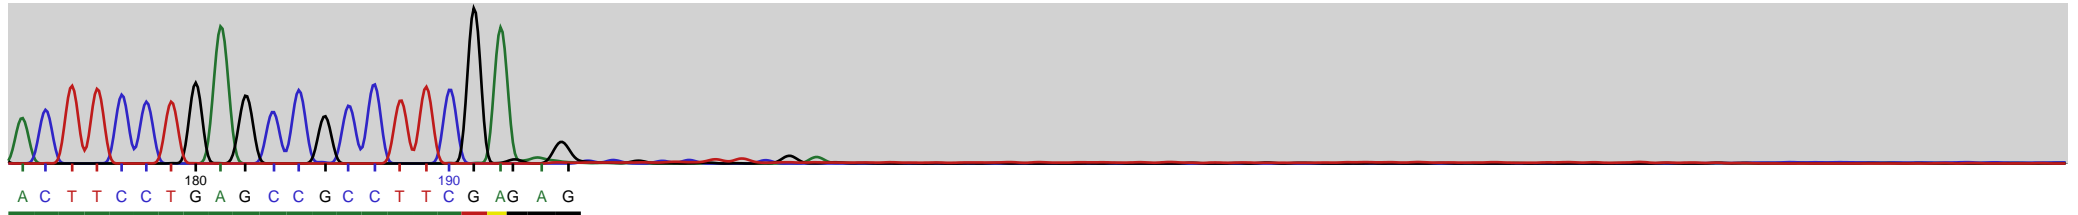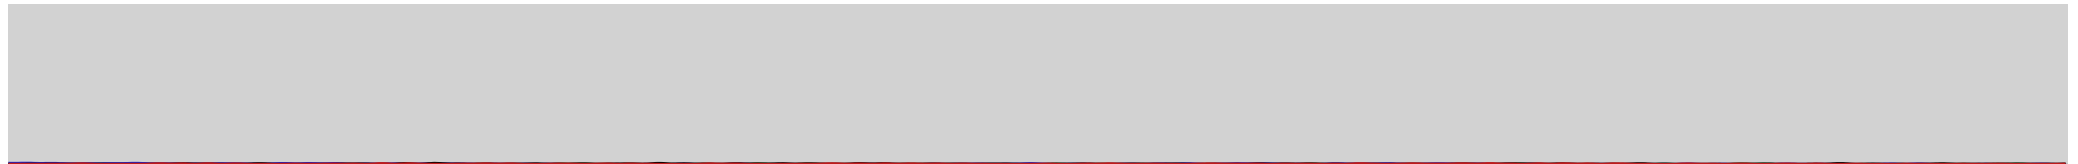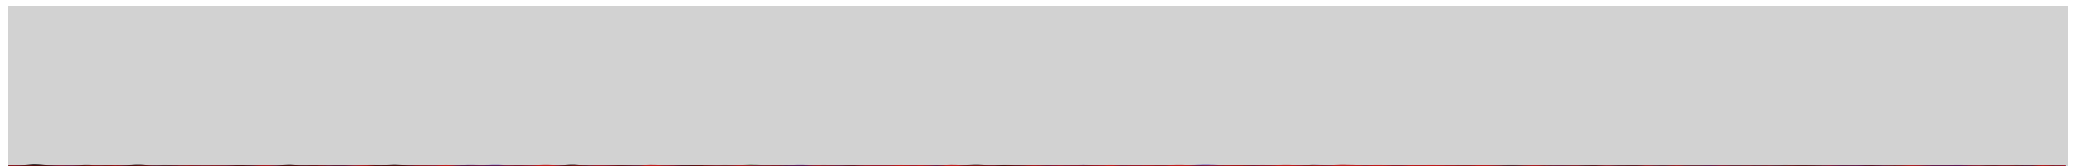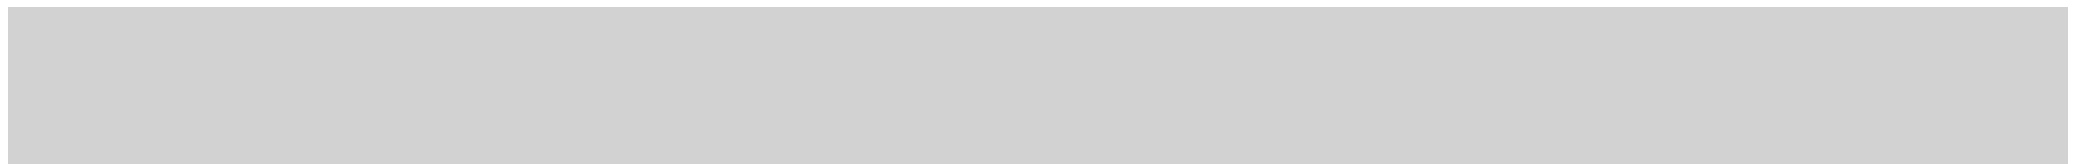

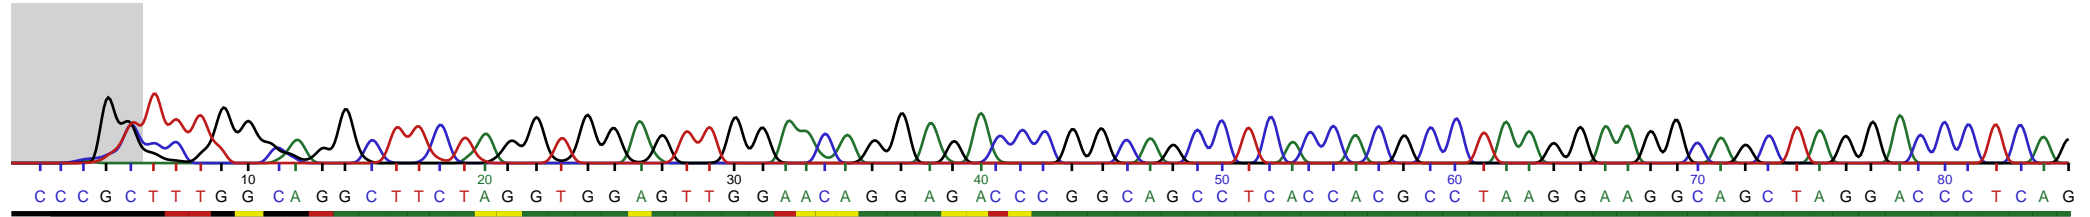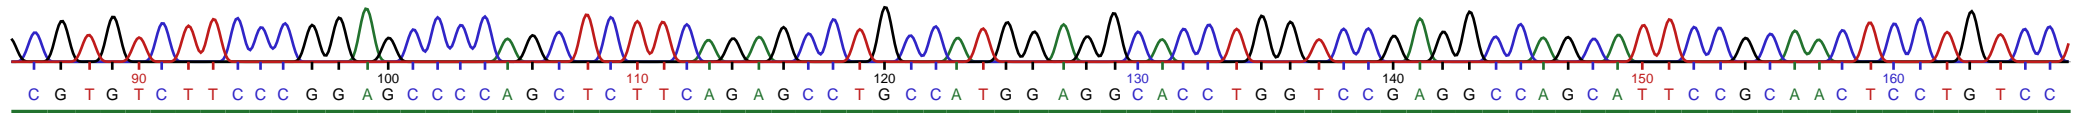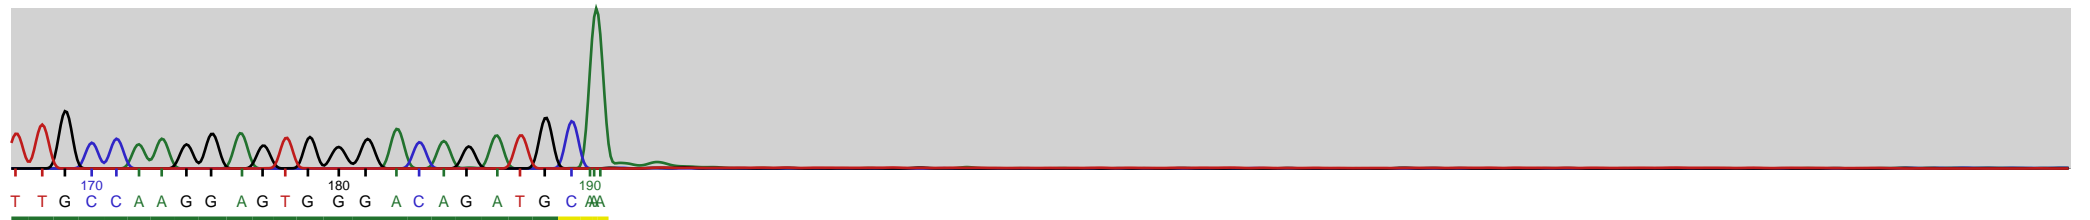

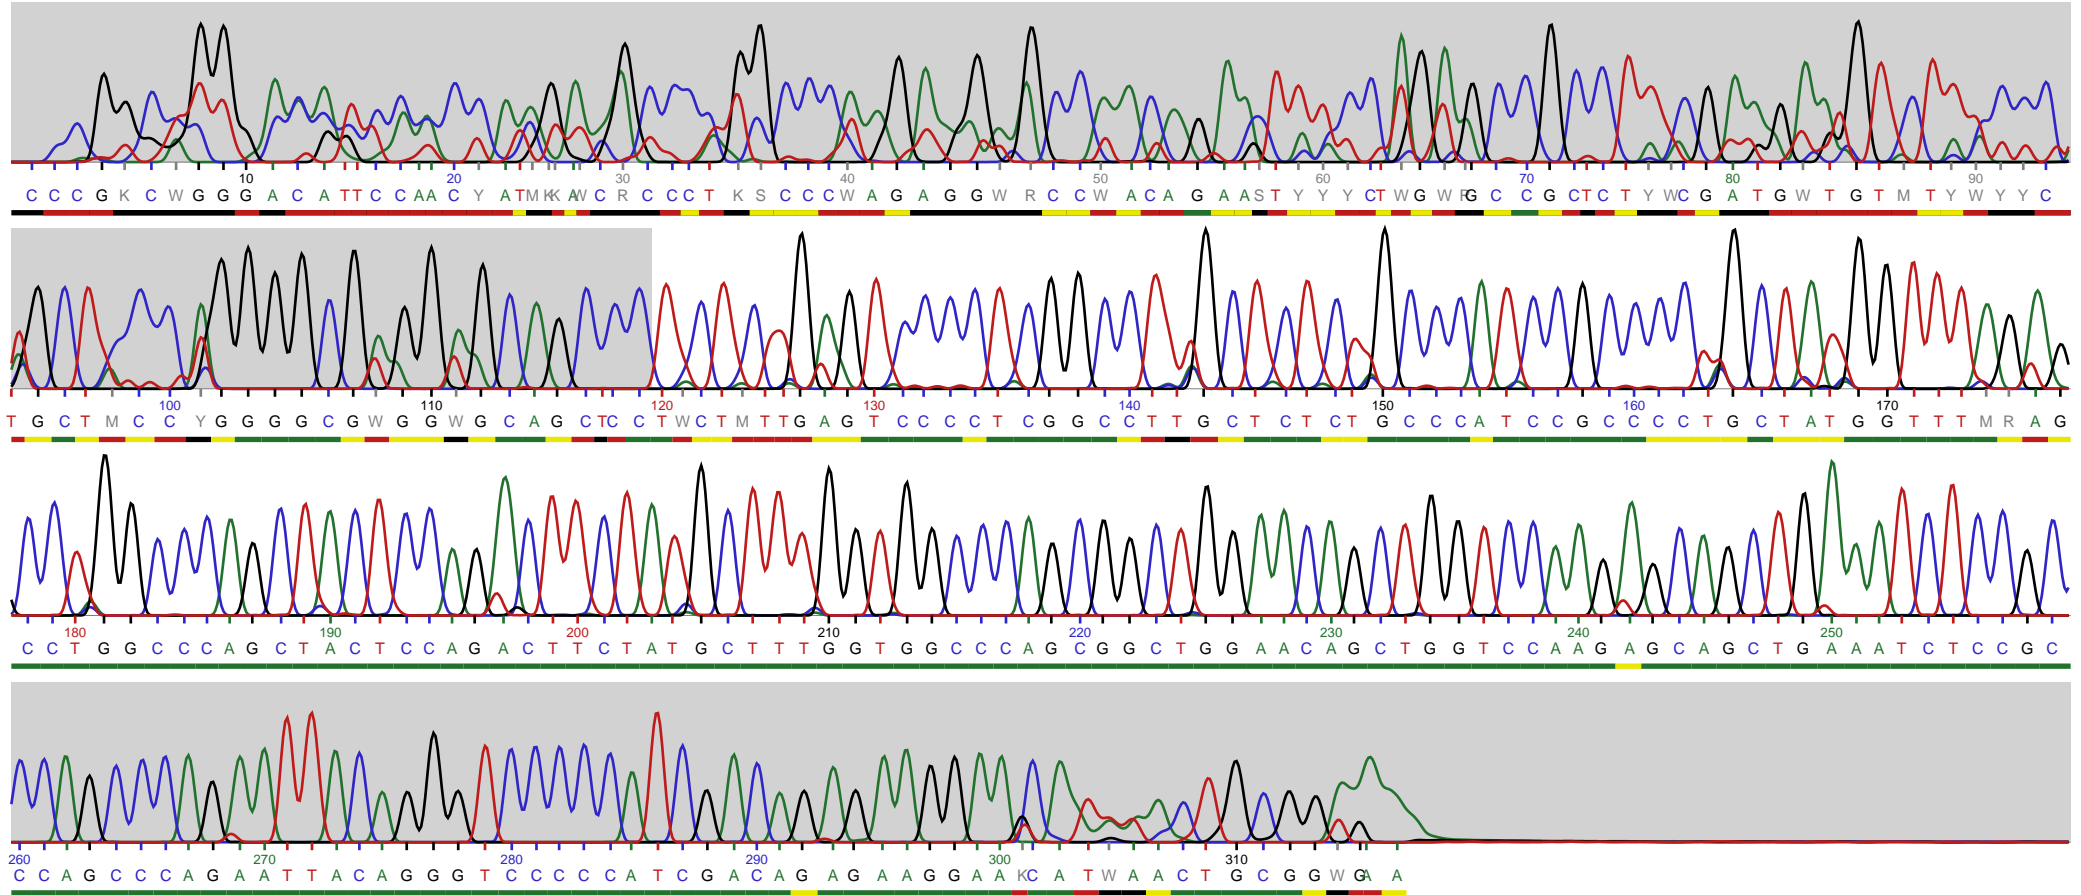

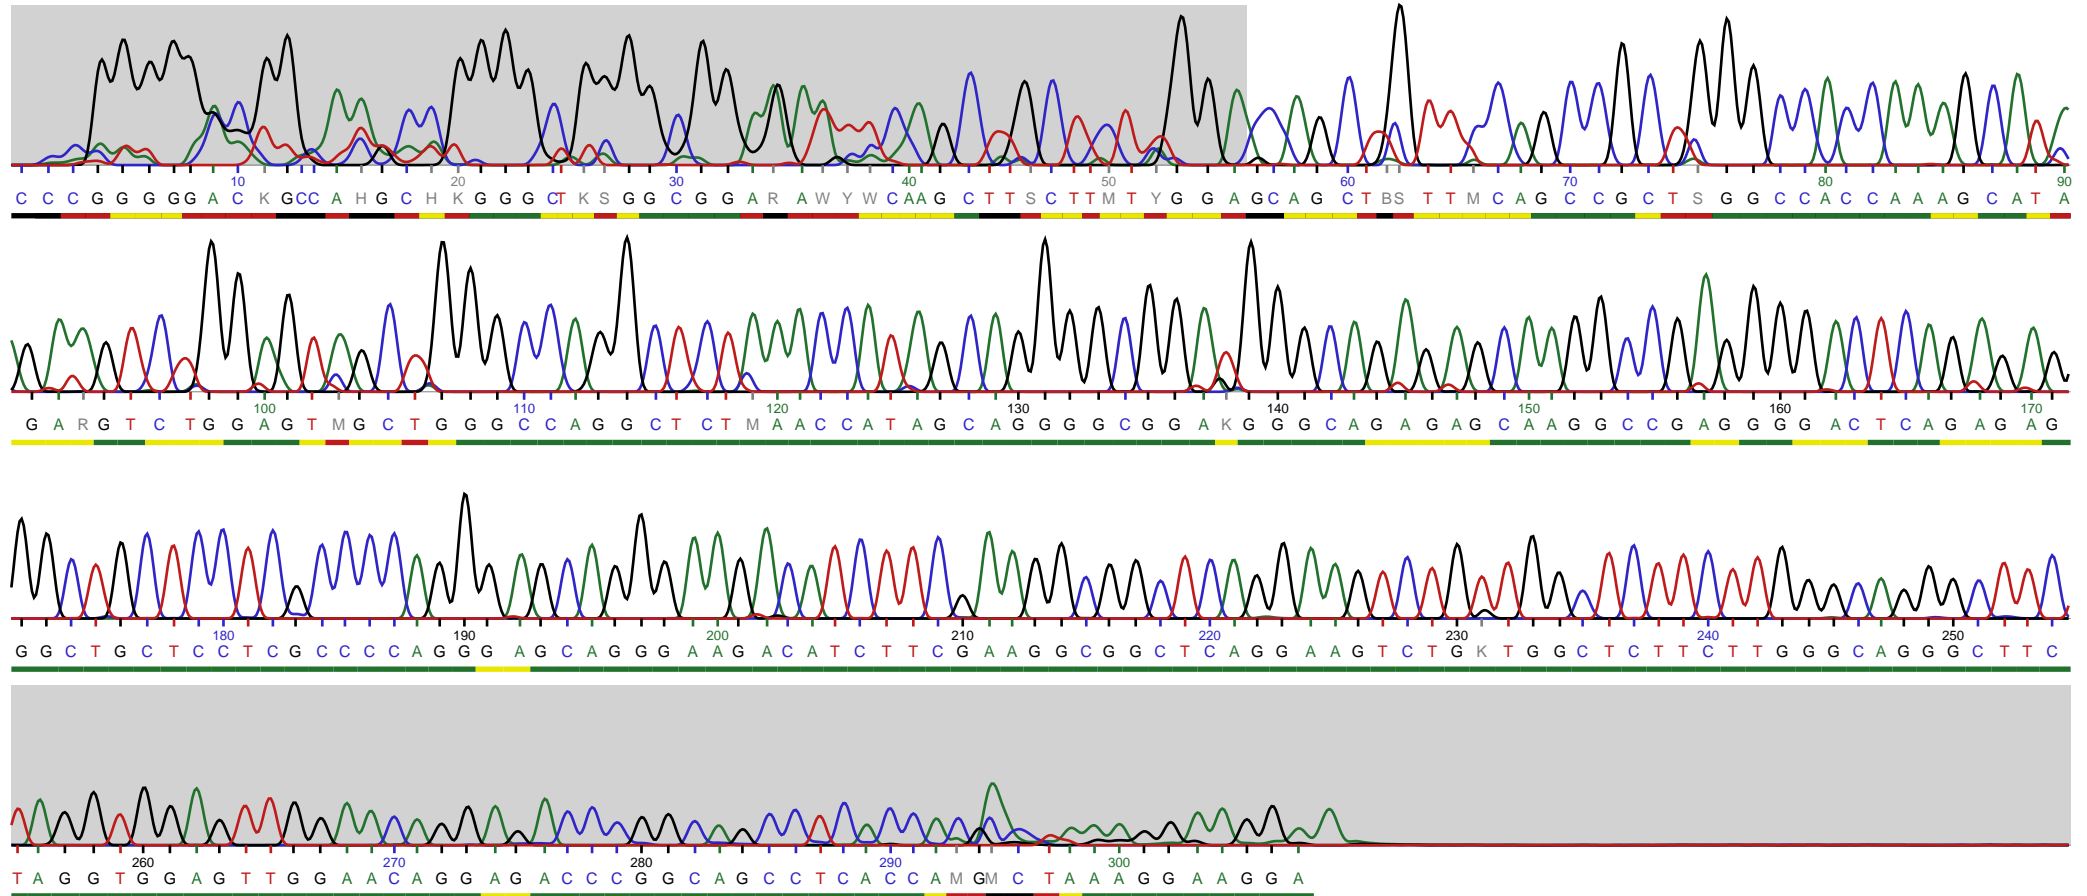

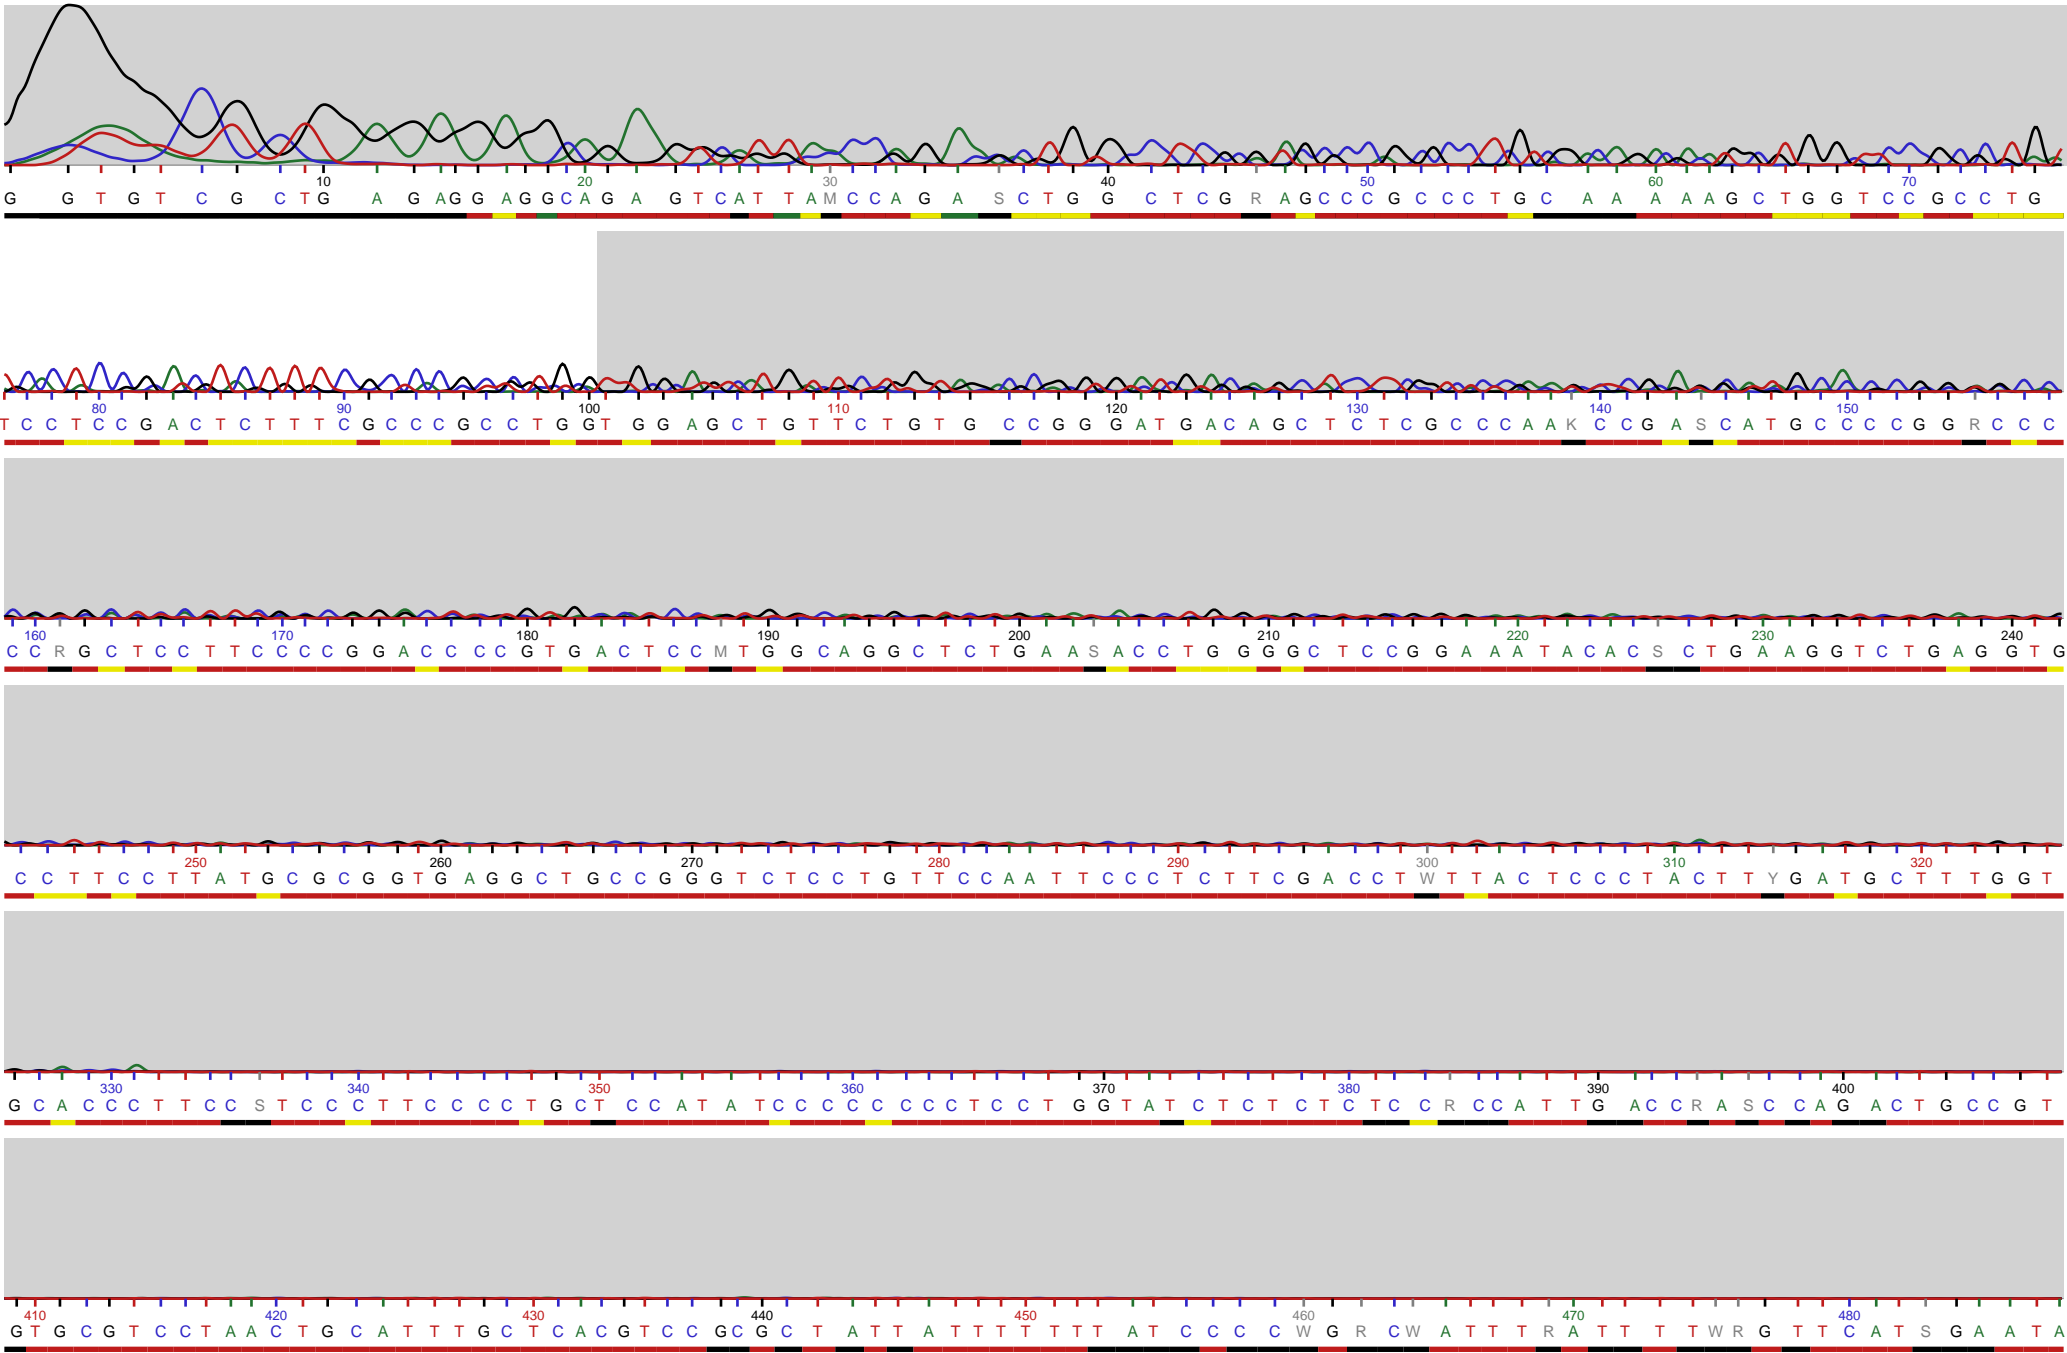

Clip. 1 BQ 20 WL 10 Sequence: circ-2\_Ex5F-Ex4R\_R

Clipped length: 17  
Left clip: 119  
Right clip: 135  
Avg. qual. in clip.: 19.64

Samples: 12962  
Bases: 511  
Average spacing: 26.0  
Average quality >= 10: 335, 20: 46, 30: 1

Quality: 0 - 9  
10 - 19  
20 - 29  
>= 30

Page: 1 / 3  
10.08.2020

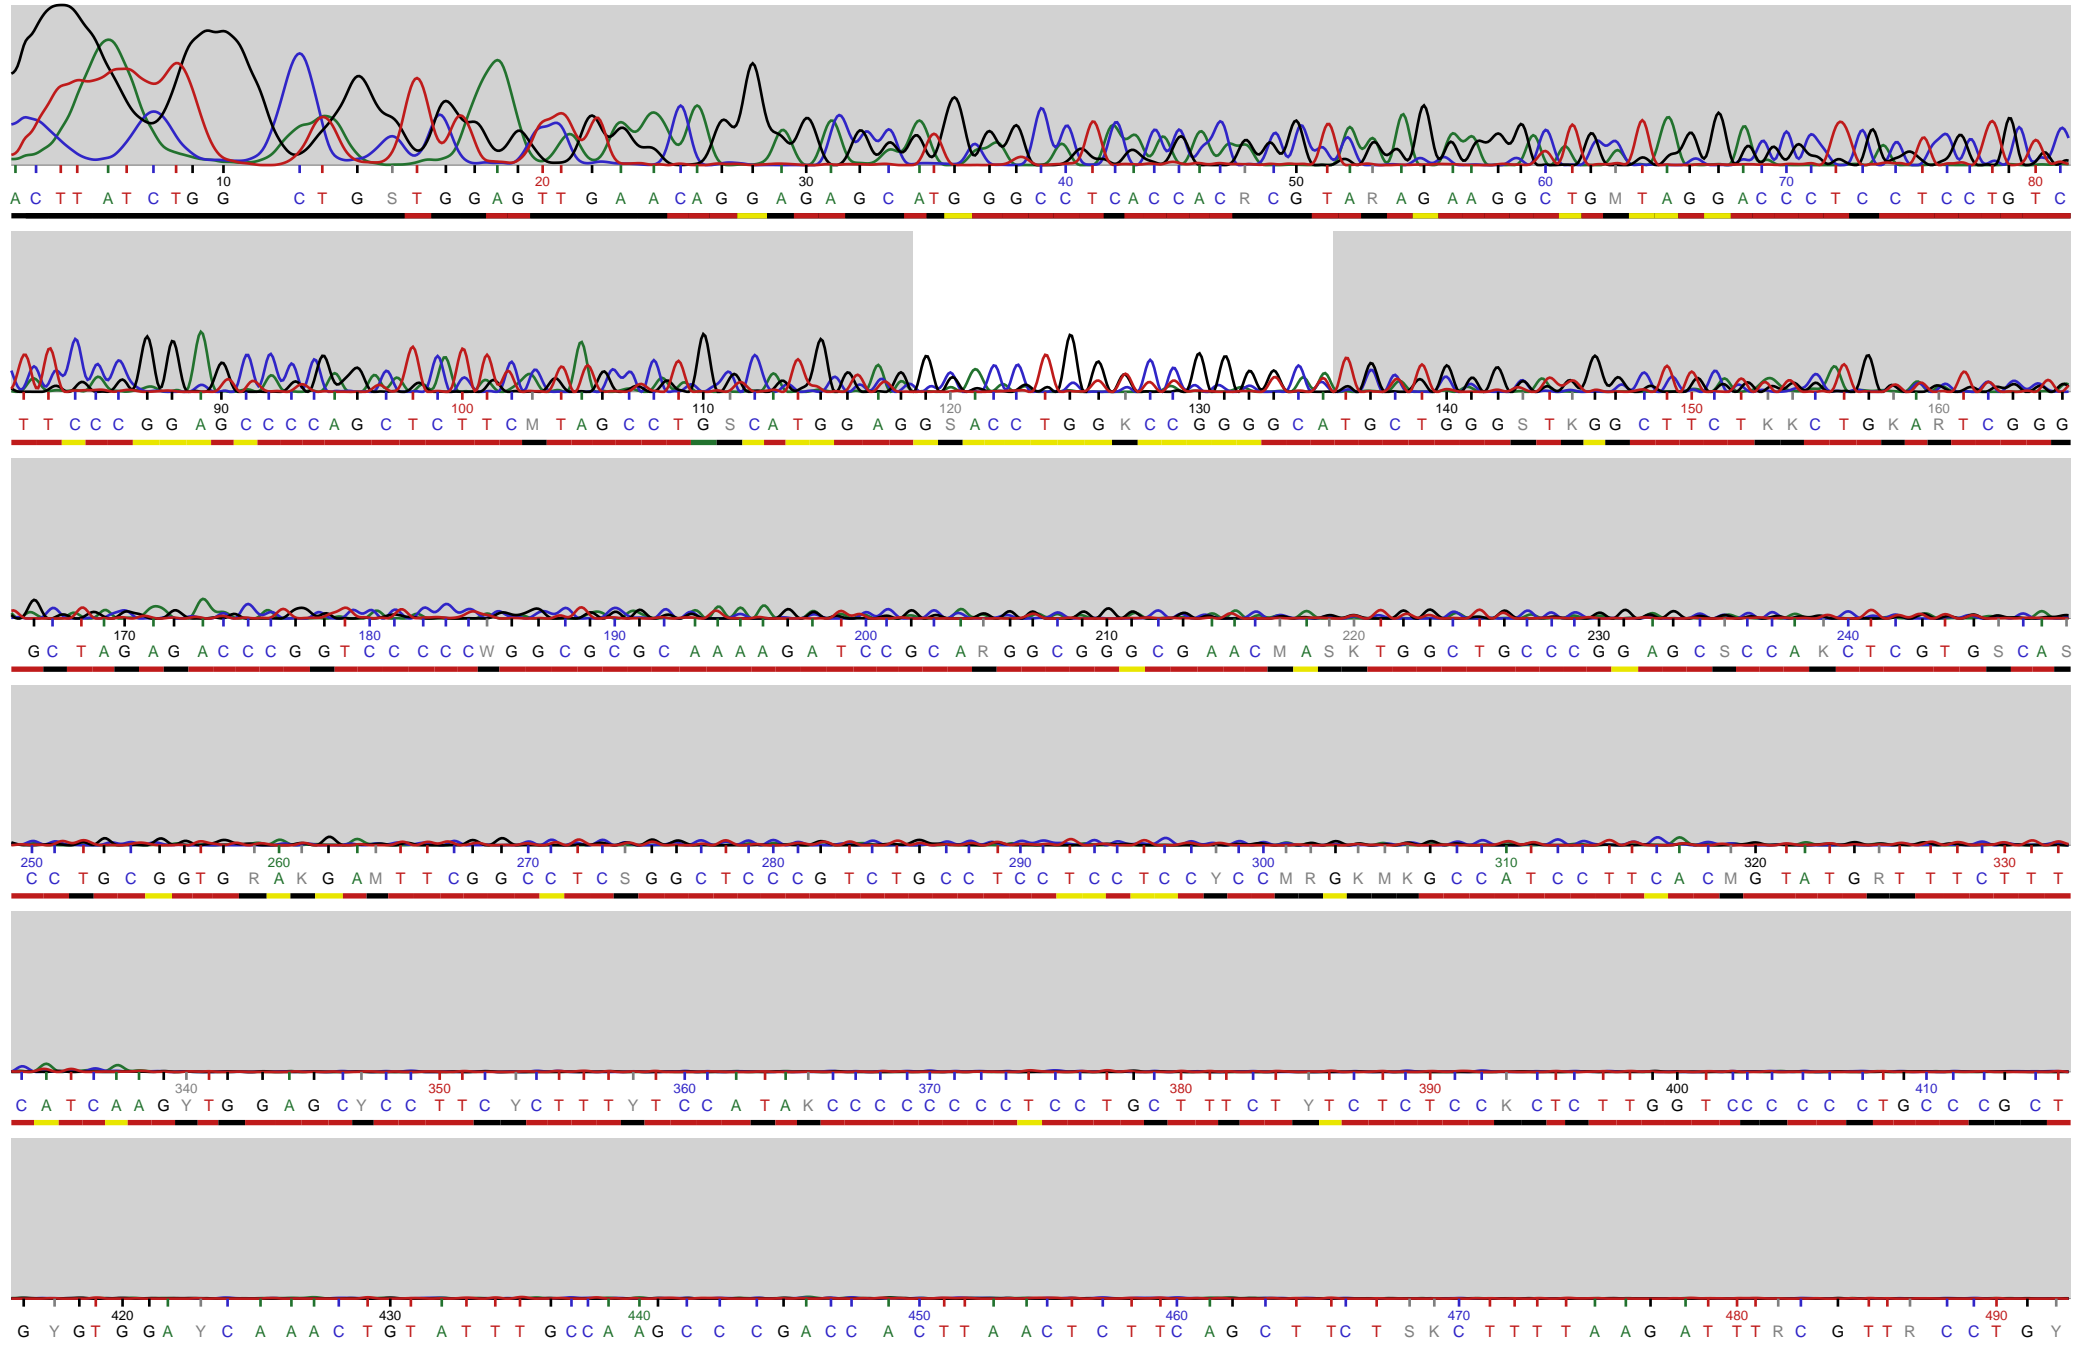

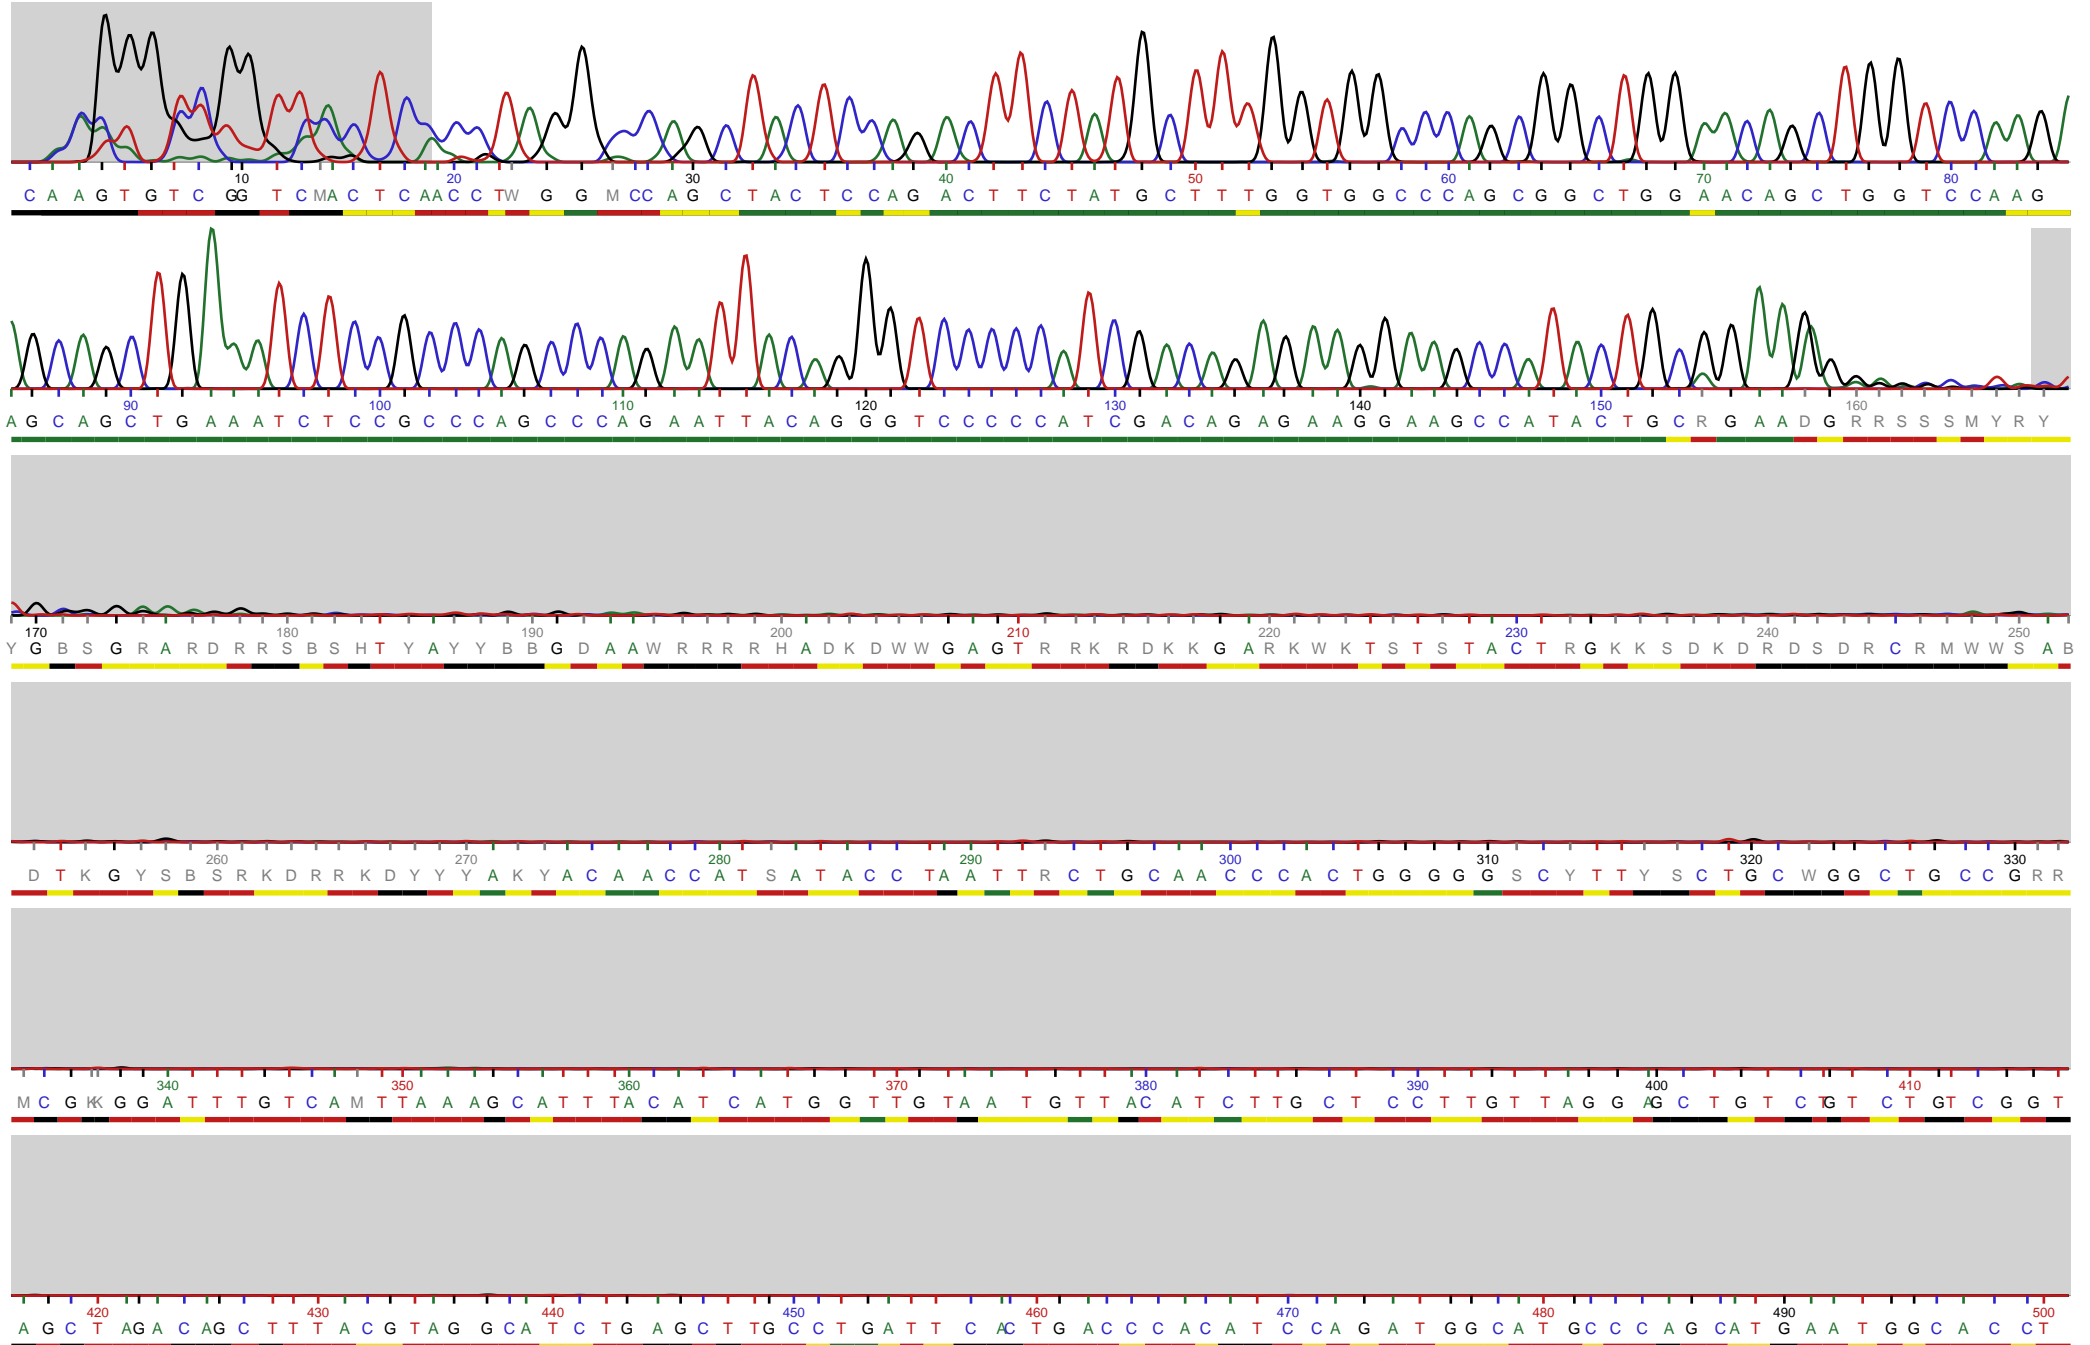

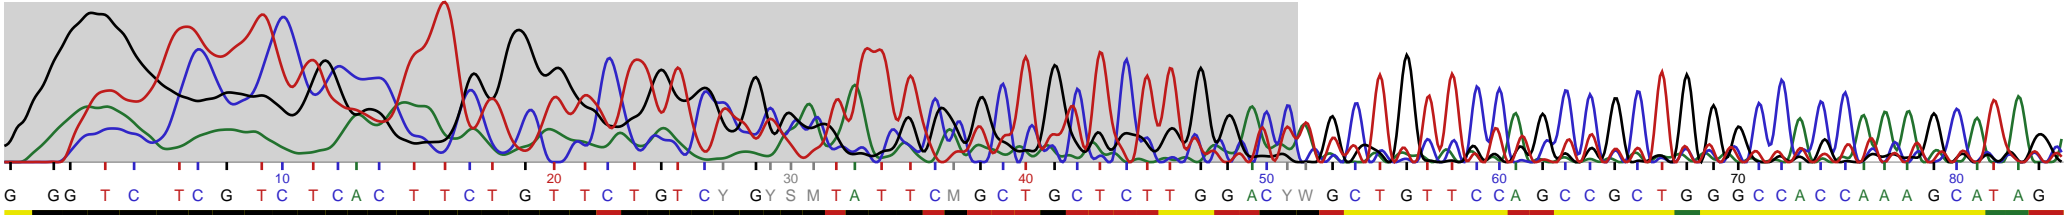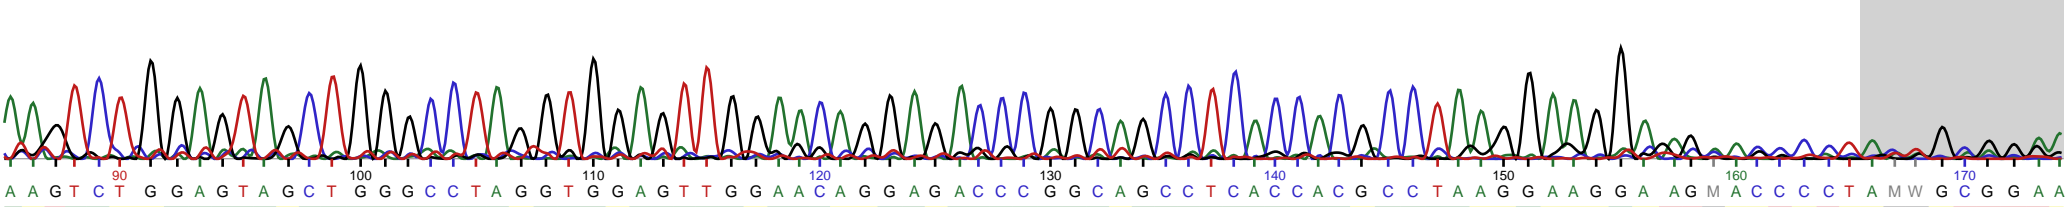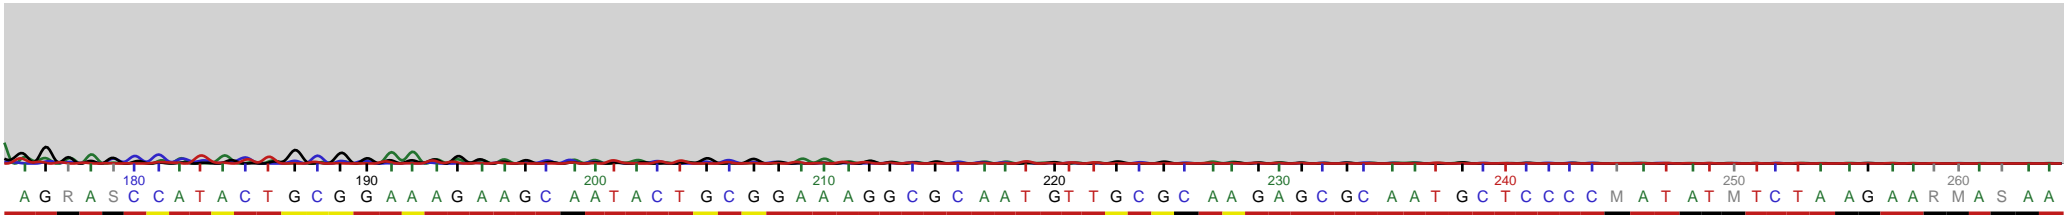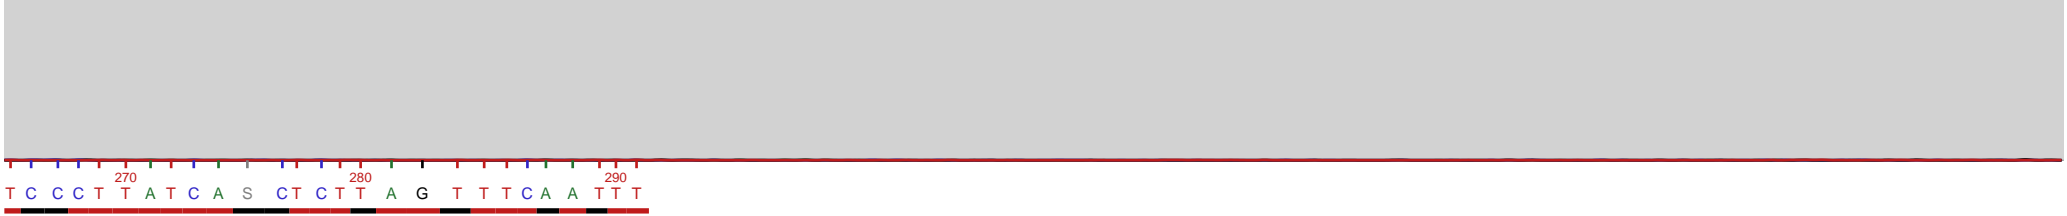

Supplement: s1 [file s1]
